# Supplementary material for: Identification of ferredoxin II as a major calcium binding protein in the nitrogen-fixing symbiotic bacterium Mesorhizobium loti
Source: PubMed Central journal article supplement (PMC4322793; doi:10.1186/s12866-015-0352-5), 2015-02-04
Supplement: 12866_2015_352_MOESM3_ESM.pdf [file 12866_2015_352_MOESM3_ESM.pdf]

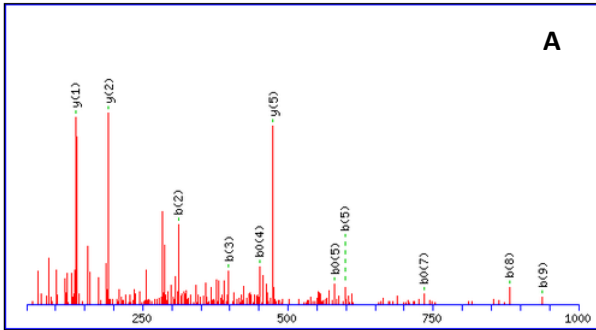

| #  | b               | b <sup>++</sup> | b <sup>0</sup>  | b <sup>0++</sup> | Seq. | y               | y <sup>++</sup> | y <sup>0</sup> | y <sup>0++</sup> | #  |
|----|-----------------|-----------------|-----------------|------------------|------|-----------------|-----------------|----------------|------------------|----|
| 1  | 164.0706        | 82.5389         |                 |                  | Y    |                 |                 |                |                  | 10 |
| 2  | <b>311.1390</b> | 156.0731        |                 |                  | F    | 908.3632        | 454.6852        | 890.3527       | 445.6800         | 9  |
| 3  | <b>398.1710</b> | 199.5892        | 380.1605        | 190.5839         | S    | 761.2948        | 381.1510        | 743.2842       | 372.1458         | 8  |
| 4  | 469.2082        | 235.1077        | <b>451.1976</b> | 226.1024         | A    | 674.2628        | 337.6350        | 656.2522       | 328.6297         | 7  |
| 5  | <b>598.2508</b> | 299.6290        | <b>580.2402</b> | 290.6237         | E    | 603.2257        | 302.1165        | 585.2151       | 293.1112         | 6  |
| 6  | 695.3035        | 348.1554        | 677.2930        | 339.1501         | P    | <b>474.1831</b> | 237.5952        | 456.1725       | 228.5899         | 5  |
| 7  | 752.3250        | 376.6661        | <b>734.3144</b> | 367.6608         | G    | 377.1303        | 189.0688        | 359.1197       | 180.0635         | 4  |
| 8  | <b>881.3676</b> | 441.1874        | 863.3570        | 432.1821         | E    | 320.1088        | 160.5581        | 302.0983       | 151.5528         | 3  |
| 9  | <b>938.3890</b> | 469.6982        | 920.3785        | 460.6929         | G    | <b>191.0662</b> | 96.0368         | 173.0557       | 87.0315          | 2  |
| 10 |                 |                 |                 |                  | D    | <b>134.0448</b> | 67.5260         | 116.0342       | 58.5207          | 1  |

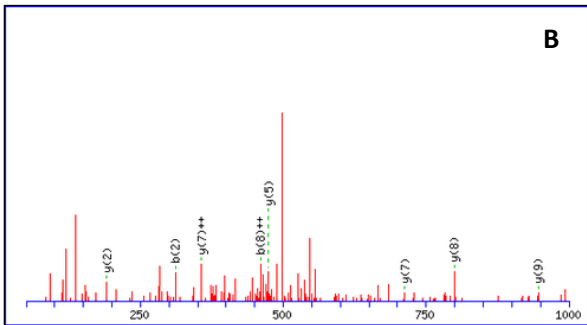

| #  | b               | b <sup>++</sup> | b <sup>0</sup> | b <sup>0++</sup> | Seq. | y               | y <sup>++</sup> | y <sup>0</sup> | y <sup>0++</sup> | #  |
|----|-----------------|-----------------|----------------|------------------|------|-----------------|-----------------|----------------|------------------|----|
| 1  | 164.0706        | 82.5389         |                |                  | Y    |                 |                 |                |                  | 10 |
| 2  | <b>311.1390</b> | 156.0731        |                |                  | F    | <b>946.3102</b> | 473.6587        | 928.2996       | 464.6534         | 9  |
| 3  | 398.1710        | 199.5892        | 380.1605       | 190.5839         | S    | <b>799.2417</b> | 400.1245        | 781.2312       | 391.1192         | 8  |
| 4  | 469.2082        | 235.1077        | 451.1976       | 226.1024         | A    | <b>712.2097</b> | <b>356.6085</b> | 694.1992       | 347.6032         | 7  |
| 5  | 636.1977        | 318.6025        | 618.1871       | 309.5972         | E    | 641.1726        | 321.0899        | 623.1620       | 312.0847         | 6  |
| 6  | 733.2505        | 367.1289        | 715.2399       | 358.1236         | P    | <b>474.1831</b> | 237.5952        | 456.1725       | 228.5899         | 5  |
| 7  | 790.2719        | 395.6396        | 772.2614       | 386.6343         | G    | 377.1303        | 189.0688        | 359.1197       | 180.0635         | 4  |
| 8  | 919.3145        | <b>460.1609</b> | 901.3040       | 451.1556         | E    | 320.1088        | 160.5581        | 302.0983       | 151.5528         | 3  |
| 9  | 976.3360        | 488.6716        | 958.3254       | 479.6663         | G    | <b>191.0662</b> | 96.0368         | 173.0557       | 87.0315          | 2  |
| 10 |                 |                 |                |                  | D    | 134.0448        | 67.5260         | 116.0342       | 58.5207          | 1  |
